# Supplementary material
Source: PubMed Central journal article supplement (PMC10330144)
Supplement: NIHMS1888395-supplement-6.pdf [file NIHMS1888395-supplement-6.pdf]

**a** Figure 1

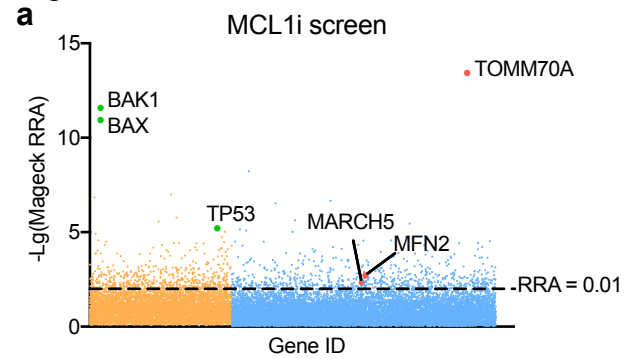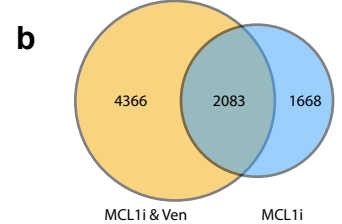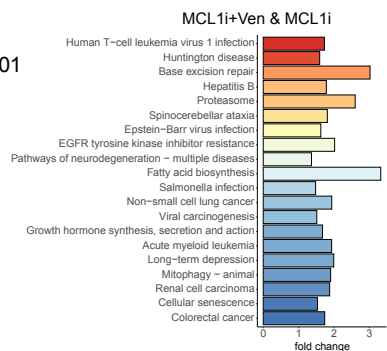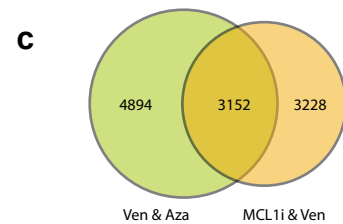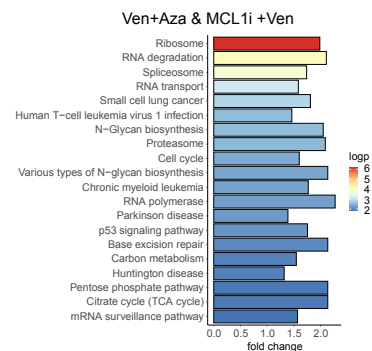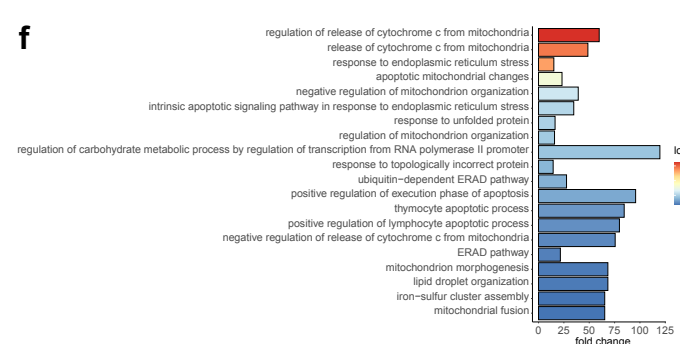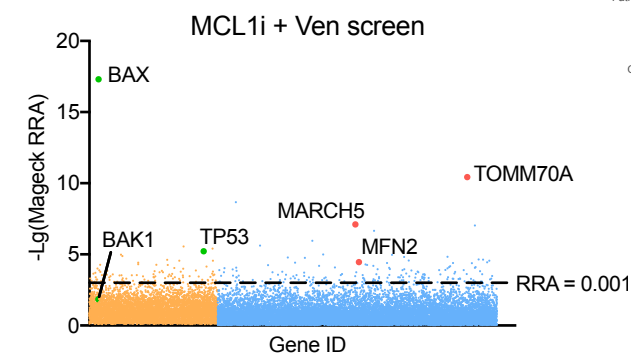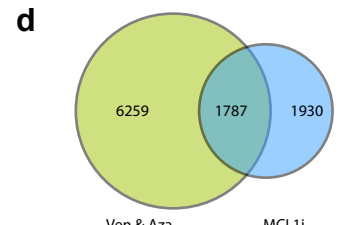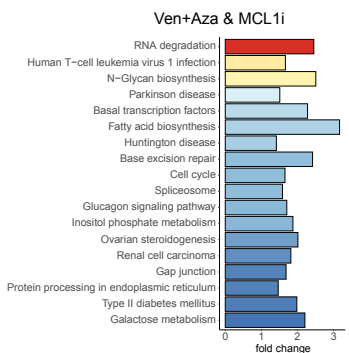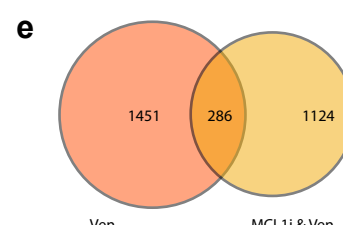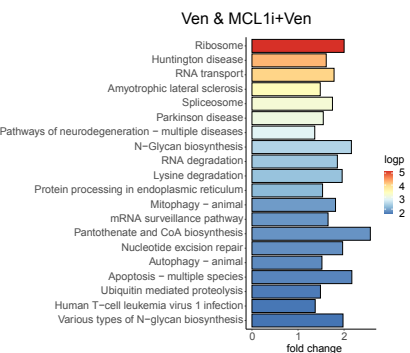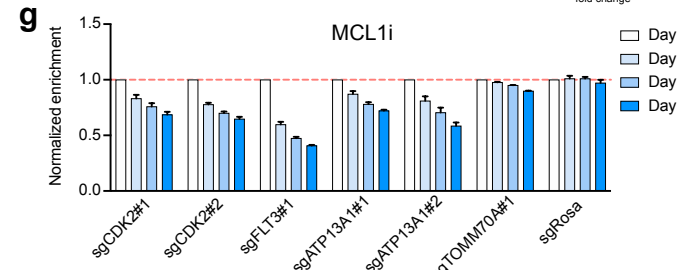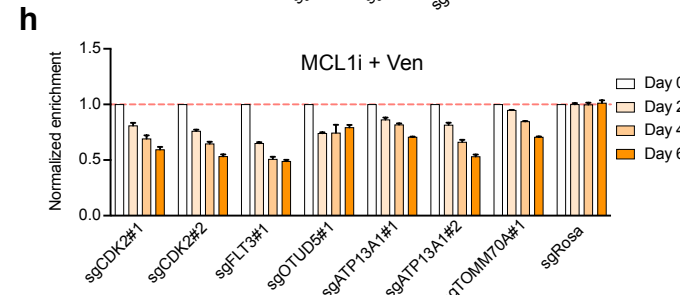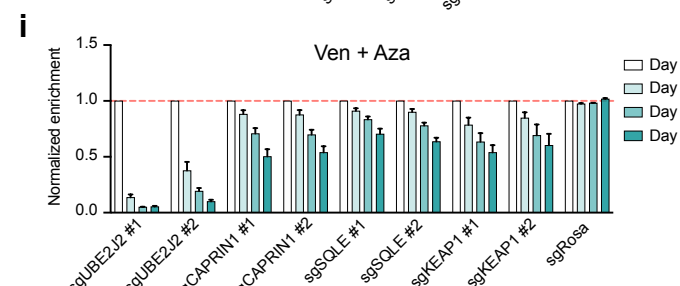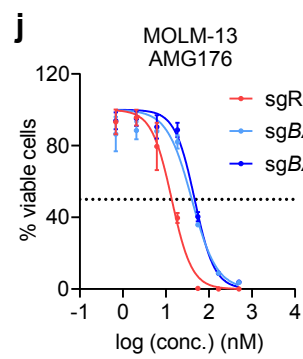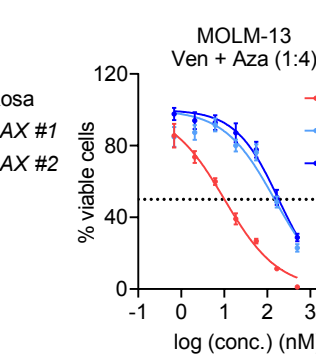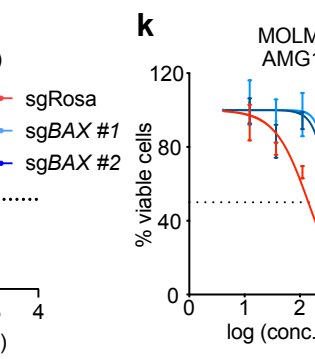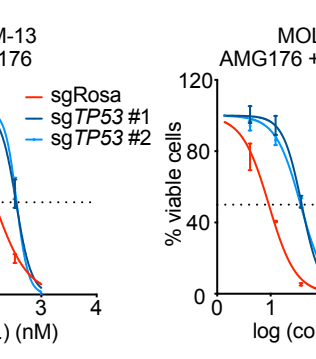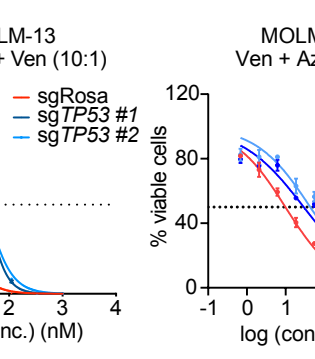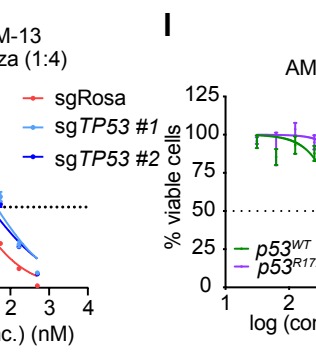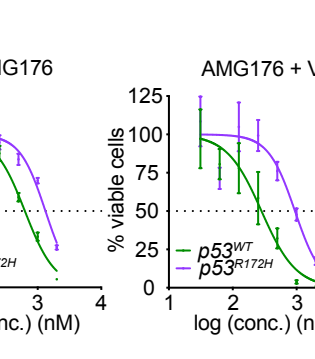

**Supplemental Figure 1. Integration of CRISPR/Cas9 loss-of-function screens to identify dependencies and liabilities in BH3-mimetics treatments.**

- a.** Manhattan plots of MCL1i (top), MCL1i+Ven (middle) and Ven+Aza (bottom) screens in MOLM-13 cells. The positive hits are highlighted in orange, while the negative hits are shown in blue.
- b-e.** Venn diagrams (top) and KEGG gene set enrichment analyses (bottom) of the significantly selected genes falling in the corresponding intersection of the pairwise screens comparisons. Data for the Ven (Venetoclax) monotherapy are from our previously published screen<sup>5</sup>.
- f.** Gene ontology (GO) enrichment analysis of the commonly selected genes in all three screens.
- g-i.** Competition-based viability assays in MOLM-13 cells treated with AMG176 (g), AMG176+Ven (h), or Ven+Aza (i).
- j.** Dose-response curves of MOLM-13 cells infected with sgRNAs targeting BAX or Rosa, and treated with increasing doses of AMG176 (left) or Ven+Aza (right).
- k.** Dose-response curves of MOLM-13 cells infected with sgRNAs targeting TP53 or Rosa, and treated with increasing doses of AMG176 (left), AMG176+Ven (middle) or Ven+Aza (right).
- l.** Dose-response curves of RN2 (p53<sup>WT</sup>) or KL974 (p53<sup>R172H</sup>) cells treated with increasing doses of AMG176 (left) or AMG176+Ven (right).

Data represent mean  $\pm$  SD (n=3). The statistical analysis was performed using unpaired two-tailed *t*-test.

**Figure 2**

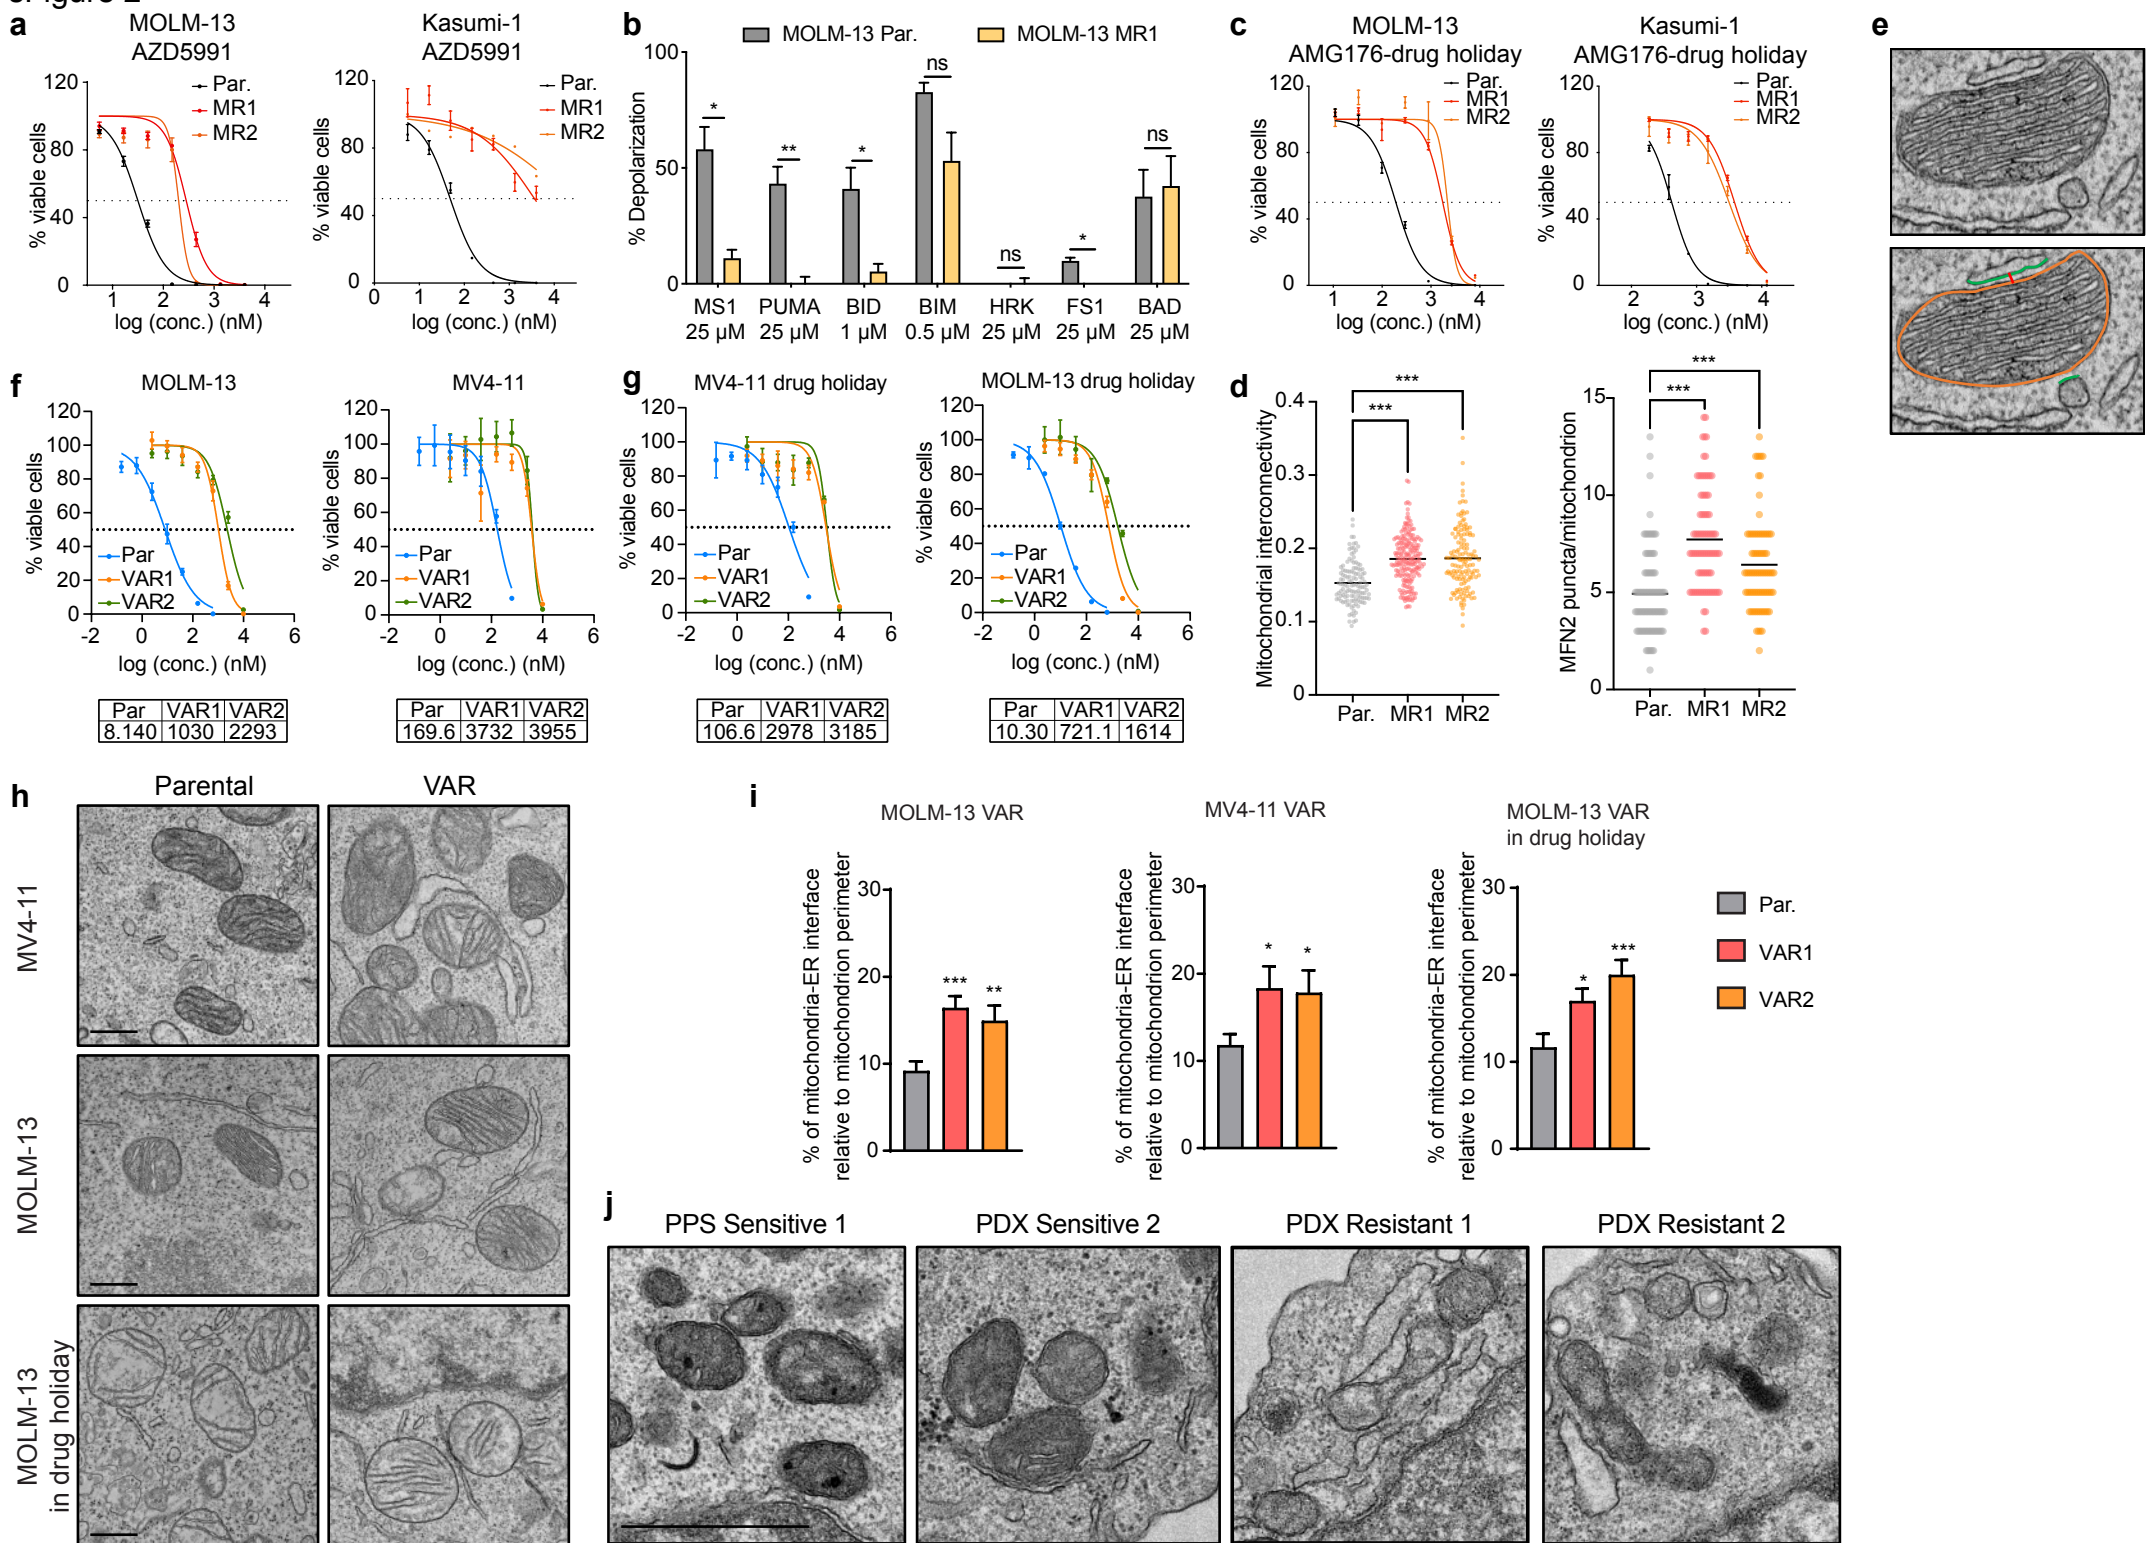

**Supplemental Figure 2. Increased mitochondria-ER interactions contribute to BH3-mimetics resistance.**

- a.** IC<sub>50</sub> curves of AZD5991 in parental (Par.) or MCL1i-resistant (MR) AML cell lines after 48 hrs treatment (MOLM-13; left, Kasumi-1; right). Data represent mean ± SD (n=3).
- b.** BH3 profiling in which the percentage of mitochondrial membrane depolarization comparing MOLM-13 parental and MOLM-13 MR1 cells was measured (n=4, mean ± SD). A representative experiment from three independent biological experiments is shown.
- c.** IC<sub>50</sub> curves of AMG176 in Par. or MR AML cells after drug holiday (MOLM-13; left, Kasumi-1; right). Data represent mean ± SD (n=3).
- d.** Quantification of mitochondrial interconnectivity (area/perimeter) and measurement of MFN2 puncta per individual mitochondrion in MOLM-13 cells from super-resolution imaging.
- e.** Schematic of an electron micrograph illustrating mitochondria-ER contacts quantified in this study. The mitochondrion perimeter is colored in orange. In red we denote the mitochondrion-ER distance, and in green we illustrate the interface of ER in close apposition to the mitochondrion.
- f.** IC<sub>50</sub> curves of Ven+Aza in Par. or VAR AML cells after 48 hrs treatment (MV4-11; left, MOLM-13; right). Data represent mean ± SD (n=3). IC50 values are in nM.
- g.** IC<sub>50</sub> curves of Ven+Aza in Par. or VAR AML cells after drug holiday (MV4-11; left, MOLM-13; right). Data represent mean ± SD (n=3). IC50 values are in nM.
- h.** Representative electron micrographs of mitochondria and ER from parental or VAR MV4-11 and MOLM-13 cells. Scale bars represent 0.5 μm.
- i.** Quantification of mitochondria-ER contacts in experiments described in (g). Data represent mean ± SEM.
- j.** Representative electron micrographs of mitochondria and ER from blasts of primary and xenografted patient samples. Scale bar represents 1 μm. PPS: primary patient sample.

The statistical analysis was performed using unpaired two-tailed *t*-test.

**Figure 3**

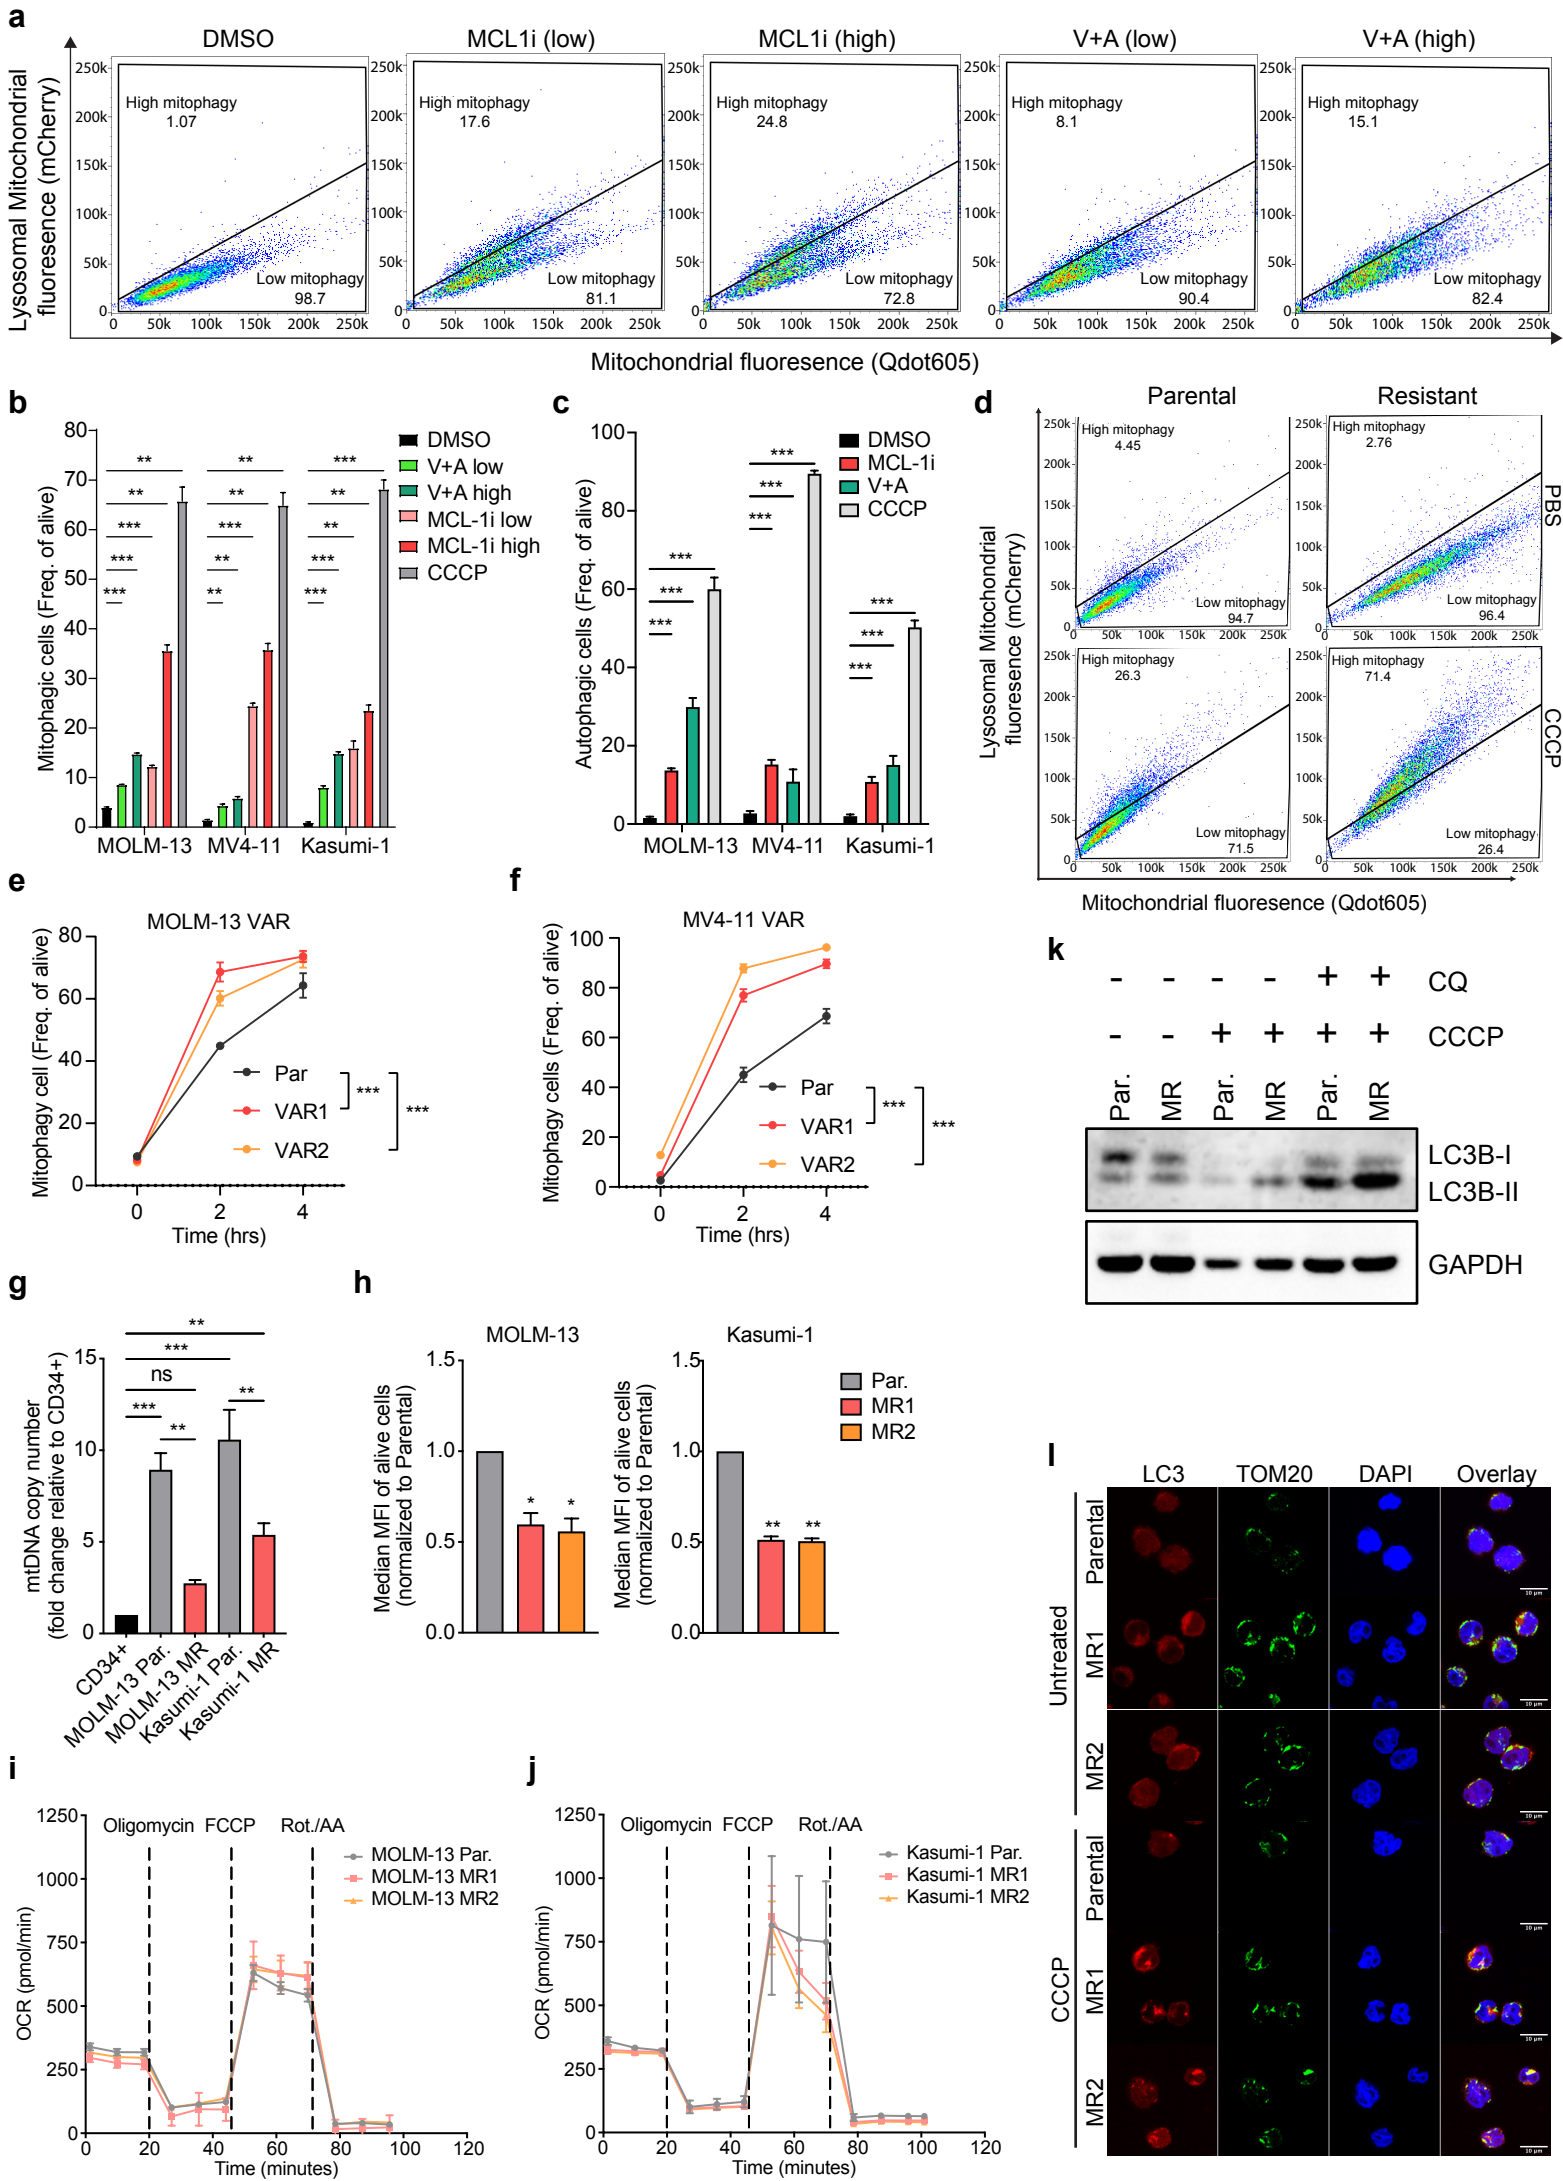

### Supplemental Figure 3. Mitophagy affects the responsiveness of AML cells to BH3-mimetics.

- a.** Representative flow cytometry plots showing Qdot 605 fluorescence (mitochondria in the cytosol, physiological pH 8.0) versus mCherry fluorescence (mitochondria within the lysosomes, acidic pH 4.5) from mitoKeima-expressing Kasumi-1 cells treated with BH3 mimetics for 16 hrs. MCL1i (AMG176) low: 700 nM; MCL1i (AMG176) high: 1800 nM; V+A (venetoclax+azacytidine) low: 400 nM+1600 nM; V+A (venetoclax+azacytidine) high: 800 nM+3200 nM.
- b.** Bar plots depicting the frequency of alive, mitoKeima-expressing AML cells undergoing mitophagy upon BH3 mimetics treatment for 16 hrs (n=3, mean  $\pm$  SD).  
MOLM-13 MCL1i (AMG176) low: 400 nM; MCL1i (AMG176) high: 1000 nM; V+A low: 10+40 nM; V+A high: 40+160 nM;  
MV4-11 MCL1i (AMG176) low: 500 nM; MCL1i (AMG176) high: 1500 nM; V+A low: 40+160 nM; V+A high: 100+400 nM;  
Kasumi-1 MCL1i (AMG176) low: 700 nM; MCL1i (AMG176) high: 1800 nM; V+A low: 400+1600 nM; V+A high: 800+3200 nM.  
CCCP: 10  $\mu$ M for all cell lines.
- c.** Bar plots depicting the frequency of alive, LC3-GFP-mCherry-expressing AML cells undergoing autophagy upon drug treatment for 21 hrs (n=3, mean  $\pm$  SD). MCL1i (AMG176): 1  $\mu$ M; V+A: (MOLM-13) 40 nM+160 nM; V+A (MV4-11): 100 nM+400 nM; V+A (Kasumi-1): 400 nM+1600 nM. CCCP: 10  $\mu$ M.
- d.** Representative flow cytometry plots showing Qdot 605 fluorescence (mitochondria in the cytosol, physiological pH 8.0) versus mCherry fluorescence (mitochondria within the lysosomes, acidic pH 4.5) from parental or resistant mitoKeima-expressing Kasumi-1 cells treated with 15  $\mu$ M CCCP or PBS for 2 hrs.
- e-f.** Frequency of mitophagic cells in a time-course of CCCP treatment (10  $\mu$ M) in MOLM-13 VAR cells (e) and MV4-11 VAR cells (f). Data represent mean  $\pm$  SD (n=3).
- g.** Quantification of mtDNA content in Parental and MR cells relative to CD34+ cells in healthy cord blood (n=3, mean  $\pm$  SEM).
- h.** Mitochondrial mass quantification based on the mean fluorescent intensity (MFI) of mitoTracker Green FM in MOLM-13 MR and parental cells (left), as well as in Kasumi-1 MR and parental cells (right) (n=3, mean  $\pm$  SEM).
- i-j.** Seahorse analyses of sensitive and resistant clones from MOLM-13 (i) and Kasumi-1 (j) (n=6, mean  $\pm$  SD).  
MOLM-13: Oligomycin 1  $\mu$ M, FCCP 2  $\mu$ M, and Rotenone/Antimycin 0.5  $\mu$ M.  
Kasumi-1: Oligomycin 1  $\mu$ M, FCCP 1  $\mu$ M, and Rotenone/Antimycin 0.5  $\mu$ M.
- k.** Immunoblotting for the autophagy marker LC3B in MOLM-13 treated with CCCP (10  $\mu$ M) for 30 min with or without chloroquine (CQ, 50  $\mu$ M) for 3 hrs.
- l.** Representative confocal images of MOLM-13 Parental and MR cells ectopically expressing LC3-mCherry, treated with CCCP, and stained for TOM20 (green; mitochondria) and DAPI (Blue; DNA). CCCP treatment leads to the formation of LC3 puncta onto mitochondria. Scale bars represent 10  $\mu$ m.

The statistical analysis was performed using unpaired two-tailed *t*-test.

sFigure 4

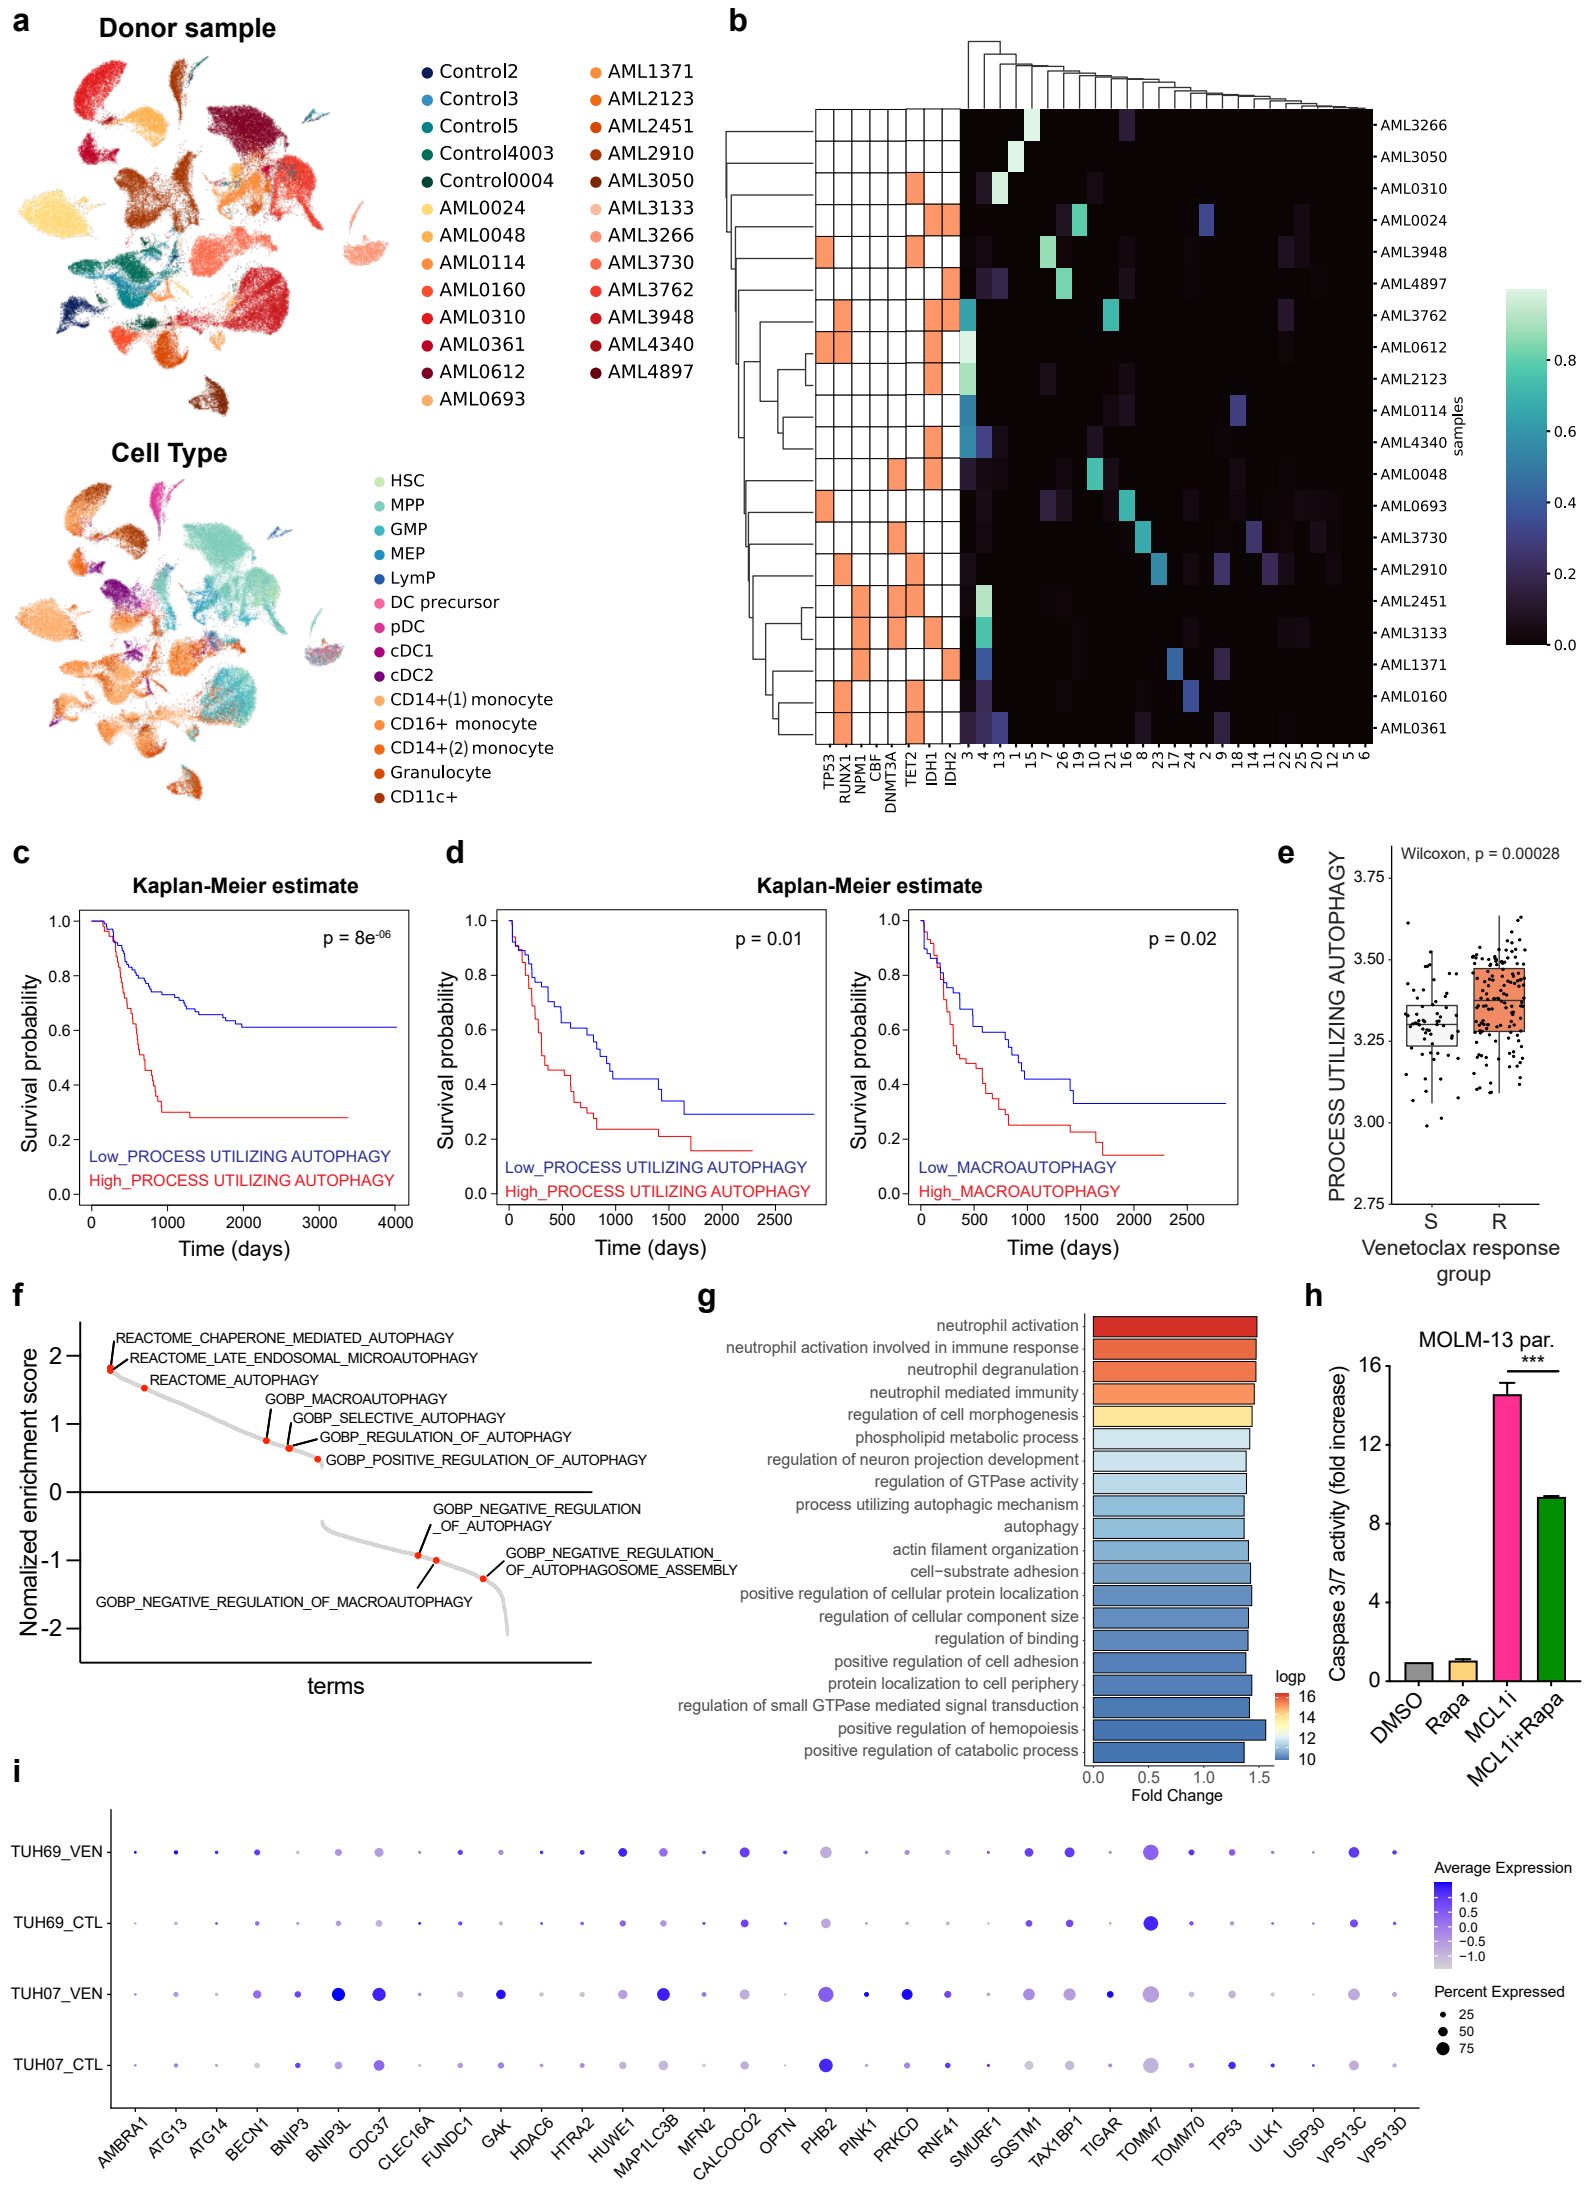

**Supplemental Figure 4. Enhanced autophagic clearance of mitochondria as a mechanism of resistance to BH3-mimetics in AML.**

- a. Uniform Manifold Approximation and Projection (UMAP) of AML malignant cells of 20 adult AML patients (top) and healthy hematopoietic stem/progenitor and myeloid cells from 5 healthy donors colored by annotated cell type (bottom).
- b. Heat map showing the usage of each of the 25 non-negative matrix factorization (NMF) gene expression profiles (GEP) in each patient and their associated mutations. Note GEP 4 corresponds to the Autophagy feature.
- c. Kaplan-Meier curves split by high/low mean gene expression of the 'Process using autophagy' GO pathway genes overlapping with autophagy GEP using overall survival (OS) as an endpoint in TARGET-AML cohort. Split points were determined using rpart. Log rank test was used to determine significance.
- d. Kaplan-Meier curves split by high/low mean gene expression of the 'Process using autophagy' and 'Macroautophagy' GO pathway genes overlapping with autophagy GEP using overall survival (OS) as an endpoint in TCGA-LAML cohort. Split points were determined using rpart. Log rank test was used to determine significance.
- e. Boxplot of 'Process using autophagy' scores in Venetoclax sensitive and resistant patients from the BeatAML cohort. Wilcoxon rank sum test was used to determine significance. Box plots represent the median with the box bounding the interquartile range (IQR) and whiskers showing the most extreme points within 1.5× IQR.
- f. Waterfall plot depicting gene set enrichment analysis of genes differentially expressed in venetoclax-resistant ( $IC_{50} > 0.25 \mu\text{M}$ ) vs. venetoclax-sensitive ( $IC_{50} < 0.25 \mu\text{M}$ ) patients of the TUH cohort<sup>6</sup>.
- g. GO pathway analysis of the top significantly differentially expressed genes in Kasumi-1 MR cells vs Kasumi-1 parental cells.
- h. Caspase 3/7 assay in MOLM-13 parental cells treated with AZD5991 (MCL1i, 1  $\mu\text{M}$ , 8 hr) and rapamycin (Rapa, 250 nM, 26 hr). Data represent mean  $\pm$  SEM of three independent biological replicates.
- i. Heat map/dot plot showing the differential mRNA expression of mitophagy-related genes in two human PDXs before and after treatment with venetoclax<sup>6</sup>. The color intensity indicates the average gene expression in each cell, while the size of the circle indicates the percentage of cells expressing the corresponding gene.

The statistical analysis was performed using unpaired two-tailed *t*-test.



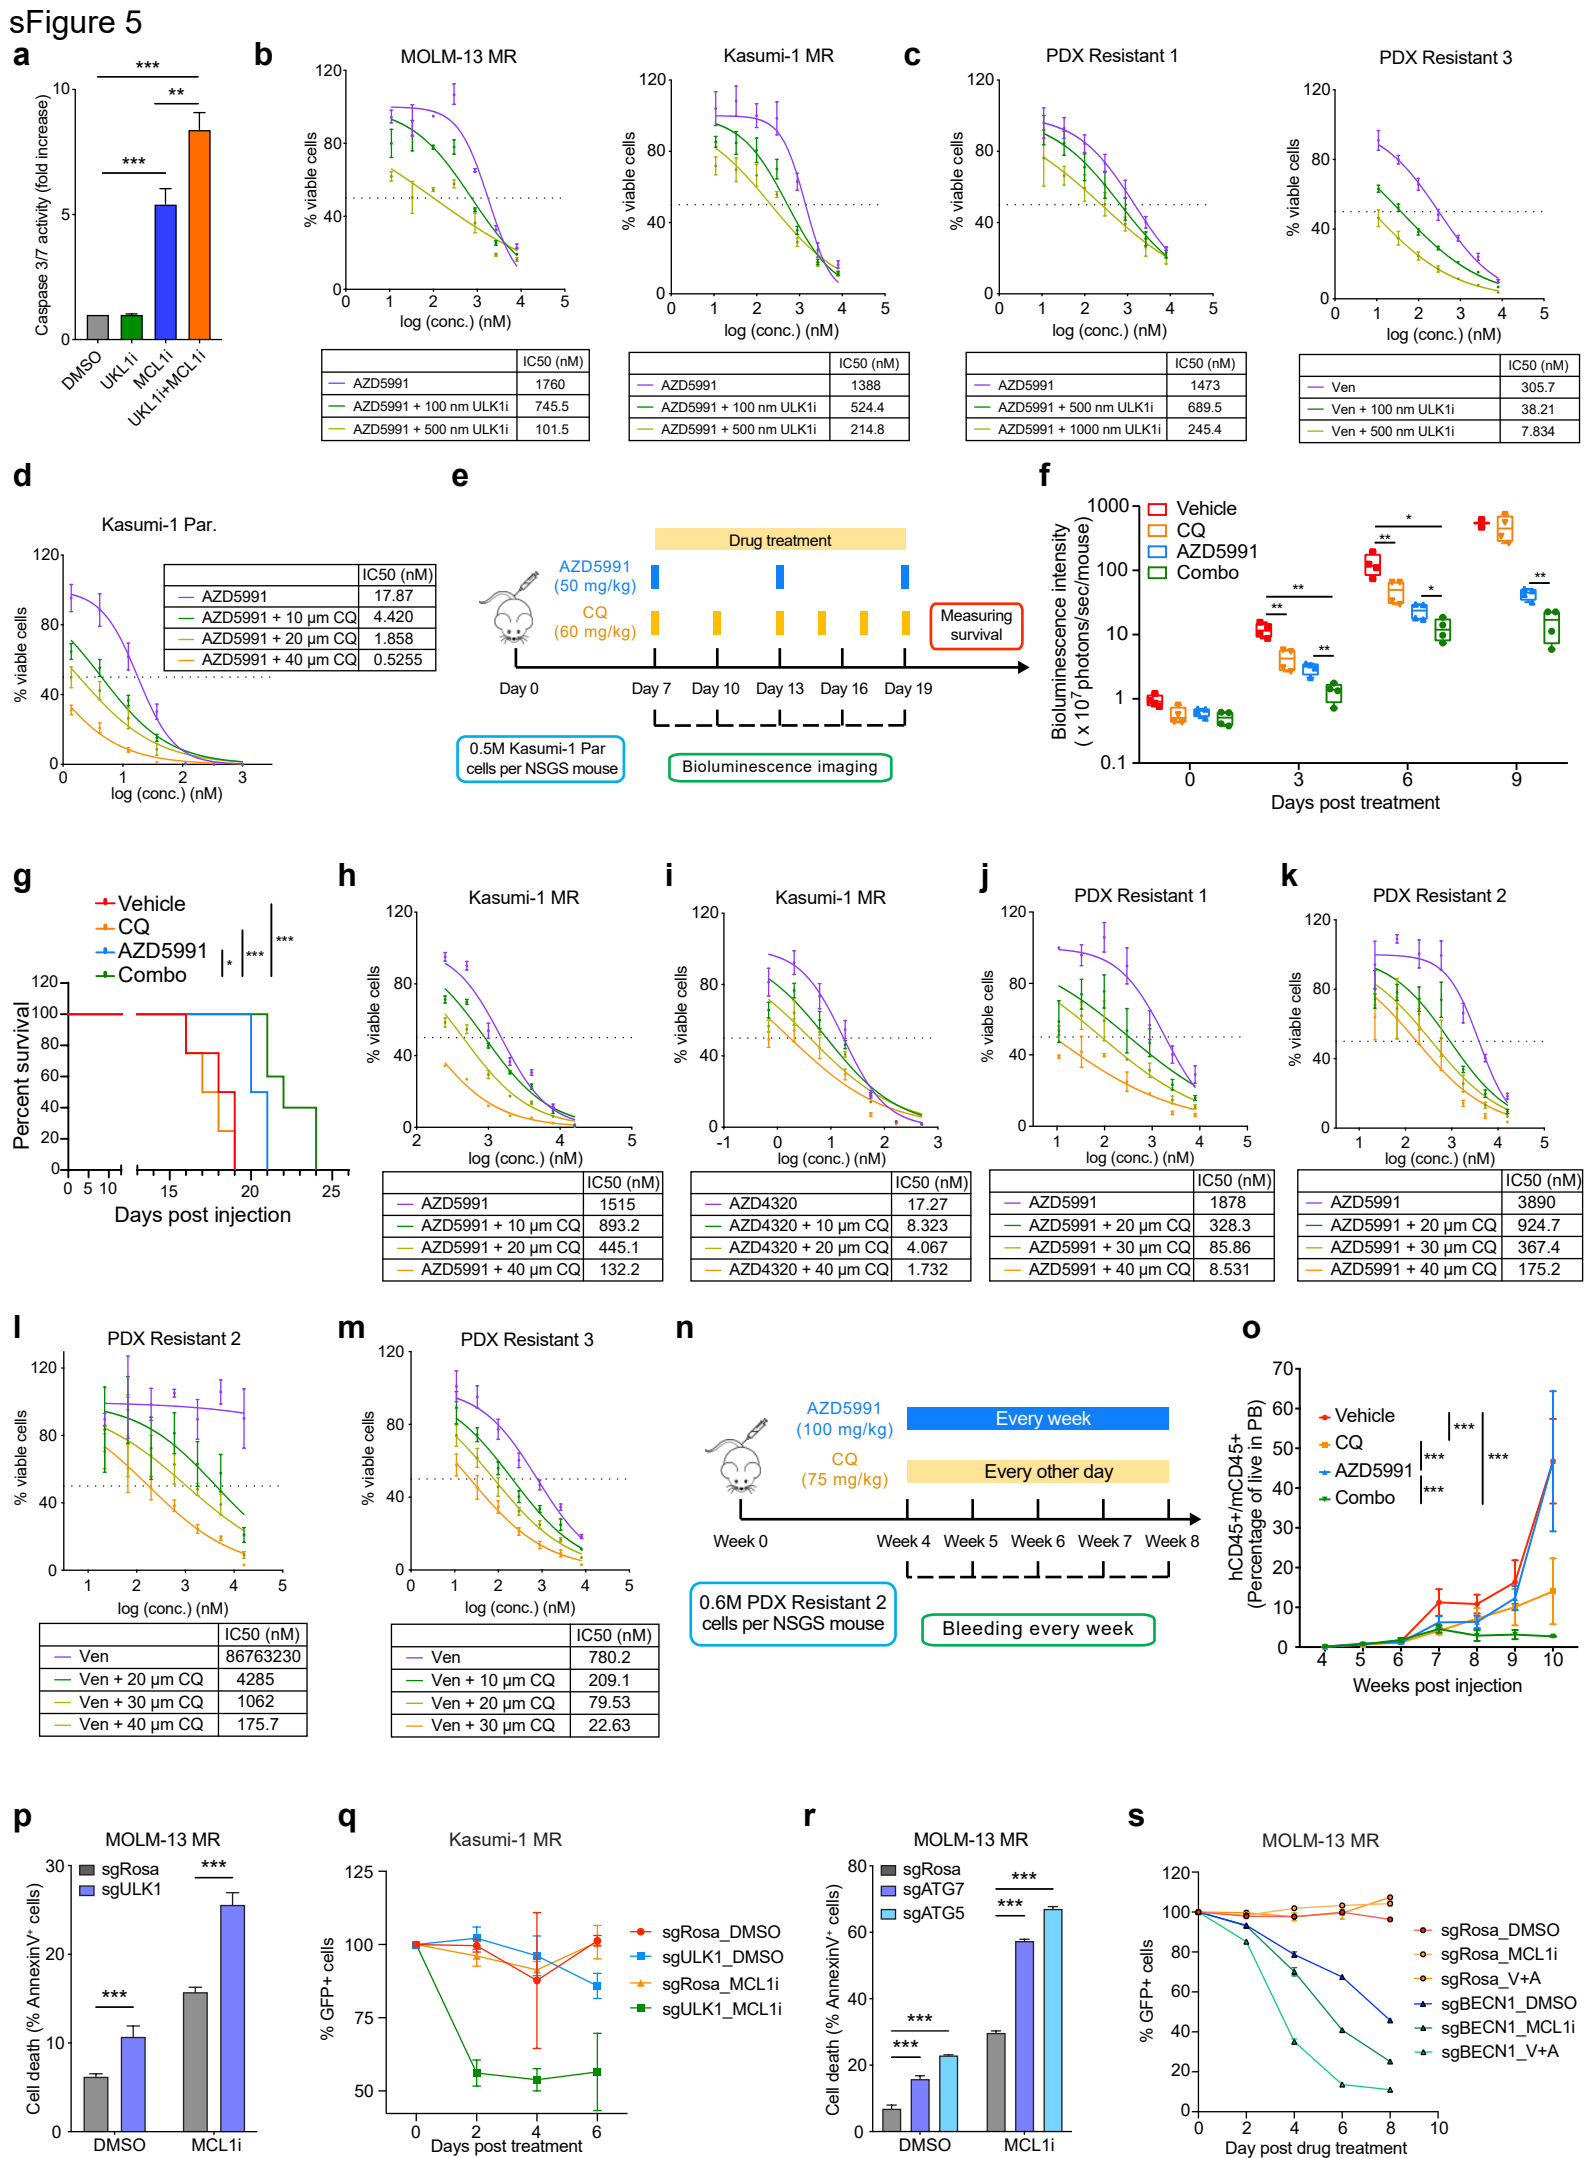

## Supplemental Figure 5. Synergism between BH3-mimetics and macroautophagy inhibition in human AML.

- a. Caspase 3/7 assay in MOLM-13 MR1 cells treated with AZD5991 (MCL1i, 1  $\mu$ M, 8 hrs) and ULK1i (500 nM, 11 hrs). Data represent mean  $\pm$  SEM of three independent biological replicates.
- b. Dose-response curves of AZD5991 from MOLM-13 (left) and Kasumi-1 (right) resistant clones with increasing concentrations of ULK1i. Treatments were performed for 24 hrs (n=3, mean  $\pm$  SD) before viability measurements using Cell Titer Glo.
- c. Dose-response curves of AZD5991 (left) or venetoclax (Ven, right) from PDX resistant 1 and 3 with increasing concentrations of ULK1i. Treatments were performed for 24 hrs (n=3, mean  $\pm$  SD) before viability measurements using Cell Titer Glo.
- d. Dose-response curves of AZD5991 from Kasumi-1 parental cells with increasing concentrations of CQ. Treatments were performed for 48 hrs (n=3, mean  $\pm$  SD) before viability measurements using Cell Titer Glo.
- e. Schematic outline of the *in vivo* experiment using parental Kasumi-1 xenografts. Mice were transplanted with  $0.5 \times 10^6$  GFP/Luciferase-expressing Kasumi-1 cells. Mice were administrated weekly with AZD5991 or CQ or their combination (Combo) or Vehicle. Bioluminescent imaging was performed at the indicated time points to measure tumor burden. Survival was measured at the end of the experiment.
- f. Quantification of bioluminescence emitted from the whole body of each mouse described in (e) at the indicated time points.
- g. Kaplan-Meier survival curves of MOLM-13 leukemia recipient mice in experiments as in Fig. S5e. The p-values were determined using the Log-rank Mantel-Cox test.
- h-i. Dose-response curves of AZD5991 (h) or AZD4320 (i) with increasing concentrations of CQ from Kasumi-1 MR cells. Treatments were performed for 48 hrs before viability measurements using Cell Titer Glo (n=3, mean  $\pm$  SD).
- j-k. Dose-response curves of AZD5991 with increasing concentrations of CQ from patient-derived xenografted cells. Treatments in all PDXs were performed for 24 hrs *ex vivo* (n=3, mean  $\pm$  SD).
- l-m. Dose-response curves of venetoclax (Ven) with increasing concentrations of CQ from patient-derived xenografted cells. Treatments in all PDXs were performed for 24 hrs *ex vivo* (n=3, mean  $\pm$  SD).
- n. Schematic outline of the *in vivo* experiment PDX resistant 2. Mice were transplanted with  $0.6 \times 10^6$  PDX cells. Mice were administrated weekly with AZD5991 or CQ or their combination (Combo) or Vehicle. Bleeding was performed weekly to measure tumor burden.
- o. Ratio of human CD45<sup>+</sup> cells (donor PDX cells) to mouse CD45<sup>+</sup> cells (recipient hematopoietic cells) in the peripheral blood of animals as described in (n) (mean  $\pm$  SD). Statistics were calculated using two-way ANOVA.
- p. Annexin V staining in MOLM-13 resistant cells transduced with sgRNAs targeting ULK1 or Rosa, after treatment with 500 nM AZD5991 (MCL1i) or DMSO for 24 hrs (n=3, mean  $\pm$  SD). Statistics were calculated using two-way ANOVA.
- q. Competition-based viability assays in Kasumi-1 resistant cells (MR1) transduced with sgRNAs targeting ULK1 or control (Rosa) treated with AMG176 or DMSO. Y-axis denotes the GFP<sup>+</sup> percentage relative to day 0 of treatment (n=3, mean  $\pm$  SD).
- r. Annexin V staining in MOLM-13 resistant cells transduced with sgRNAs targeting ATG5 or ATG7 or Rosa, after treatment with 800 nM AZD5991 (MCL1i) or DMSO for 24 hrs (n=3, mean  $\pm$  SD). Statistics were calculated using two-way ANOVA.
- s. Competition-based viability assays in MOLM-13 MR cells transduced with sgRNAs targeting BECN1 or Rosa, treated with MCL1i or Ven+Aza.

**Figure 6**

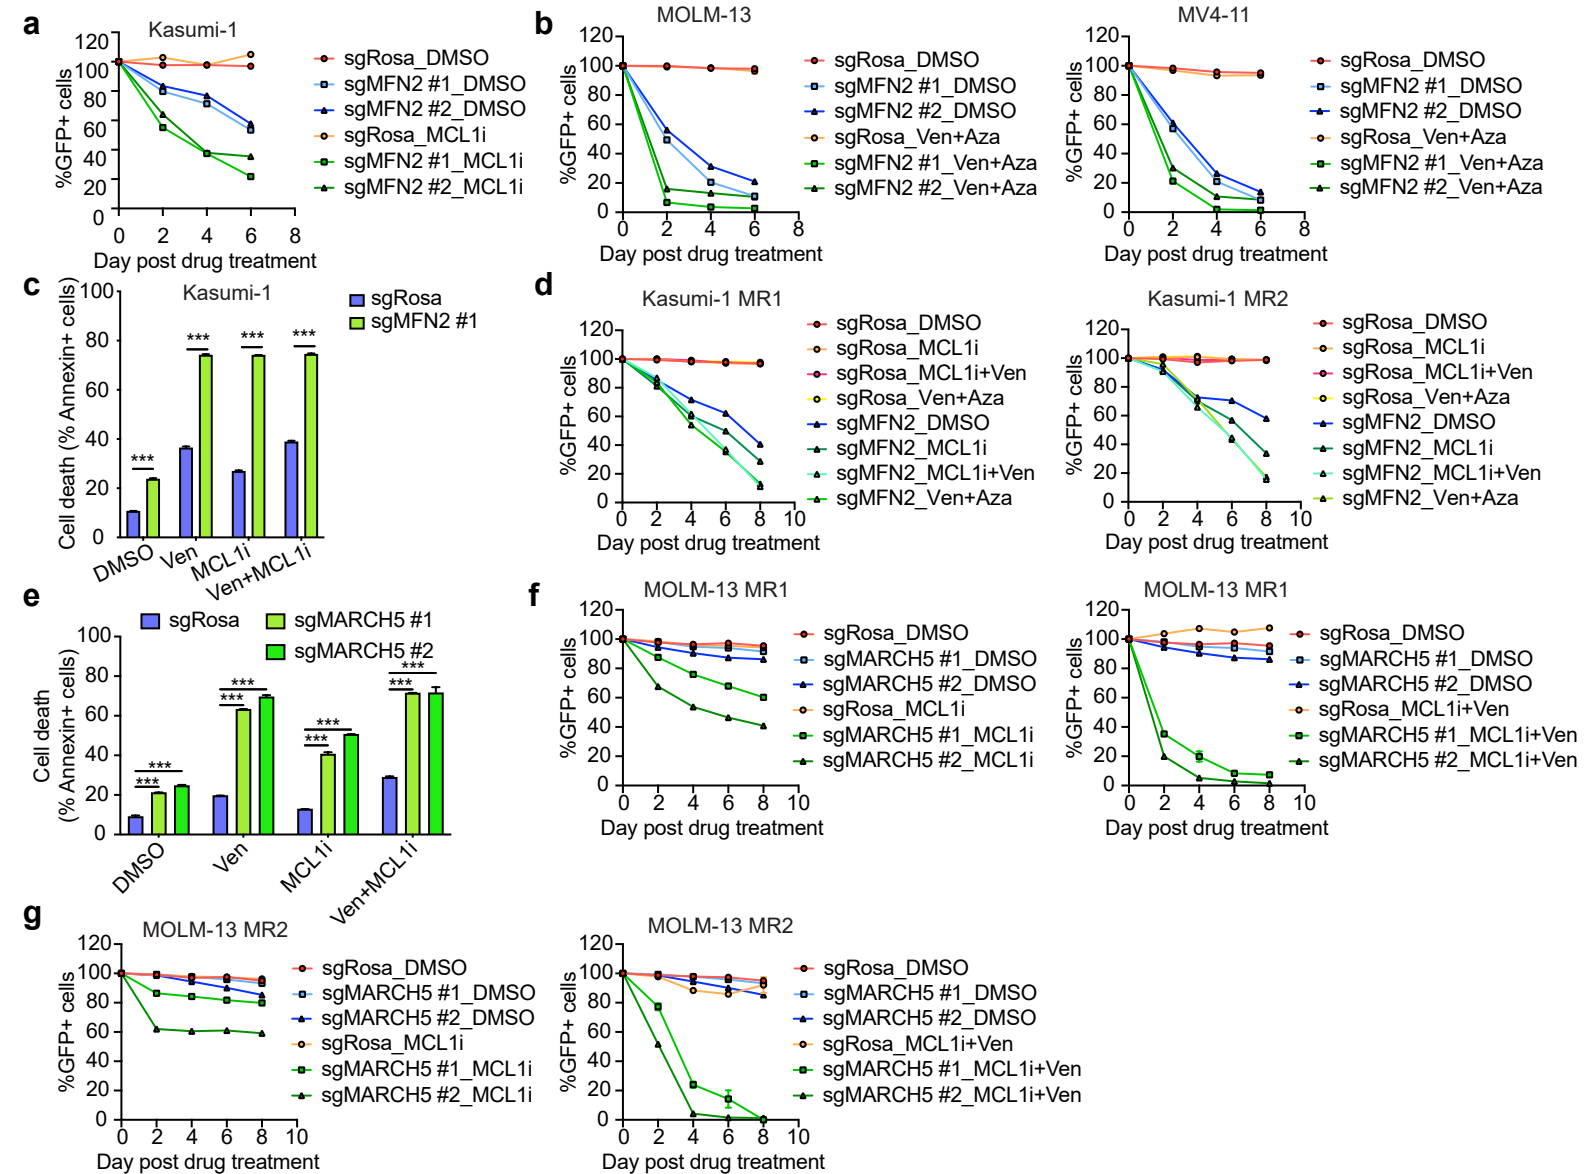

**Supplemental Figure 6. Deletion of MFN2 or MARCH5 sensitizes AML cells to BH3-mimetics.**

**a.** Competition-based viability assays in Kasumi-1 transduced with sgRNAs targeting MFN2 or control (Rosa), treated with AMG176.

**b.** Competition-based viability assays in MOLM-13 (left) and MV4-11 (right) transduced with sgRNAs targeting MFN2 or control (Rosa), treated with Ven+Aza.

**c.** Annexin V staining in puromycin-selected Kasumi-1 cells transduced with sgRNAs targeting MFN2 or control (Rosa), after treatment with BH3 mimetics or DMSO for 24 hrs.

**d.** Competition-based viability assays in Kasumi-1 MR1 (left) or MR2 (right) transduced with sgRNAs targeting MFN2 or control (Rosa), treated with AMG176 (MCL1i), AMG176 (MCL1i)+Ven, or Ven+Aza.

**e.** Annexin V staining in MOLM-13 cells transduced with sgRNAs targeting MARCH5 or control (Rosa), after treatment with BH3 mimetics or DMSO for 24 hrs.

**f-g.** Competition-based viability assays in MOLM-13 MR1 (f) MOLM-13 MR2 (g) transduced with sgRNAs targeting MARCH5 or control (Rosa), treated with AMG176 (left) or AMG176 + Ven (right).

Data represent mean  $\pm$  SD (n=3), unless otherwise stated. The statistical analysis was performed using unpaired two-tailed *t*-test.

**sFigure 7**

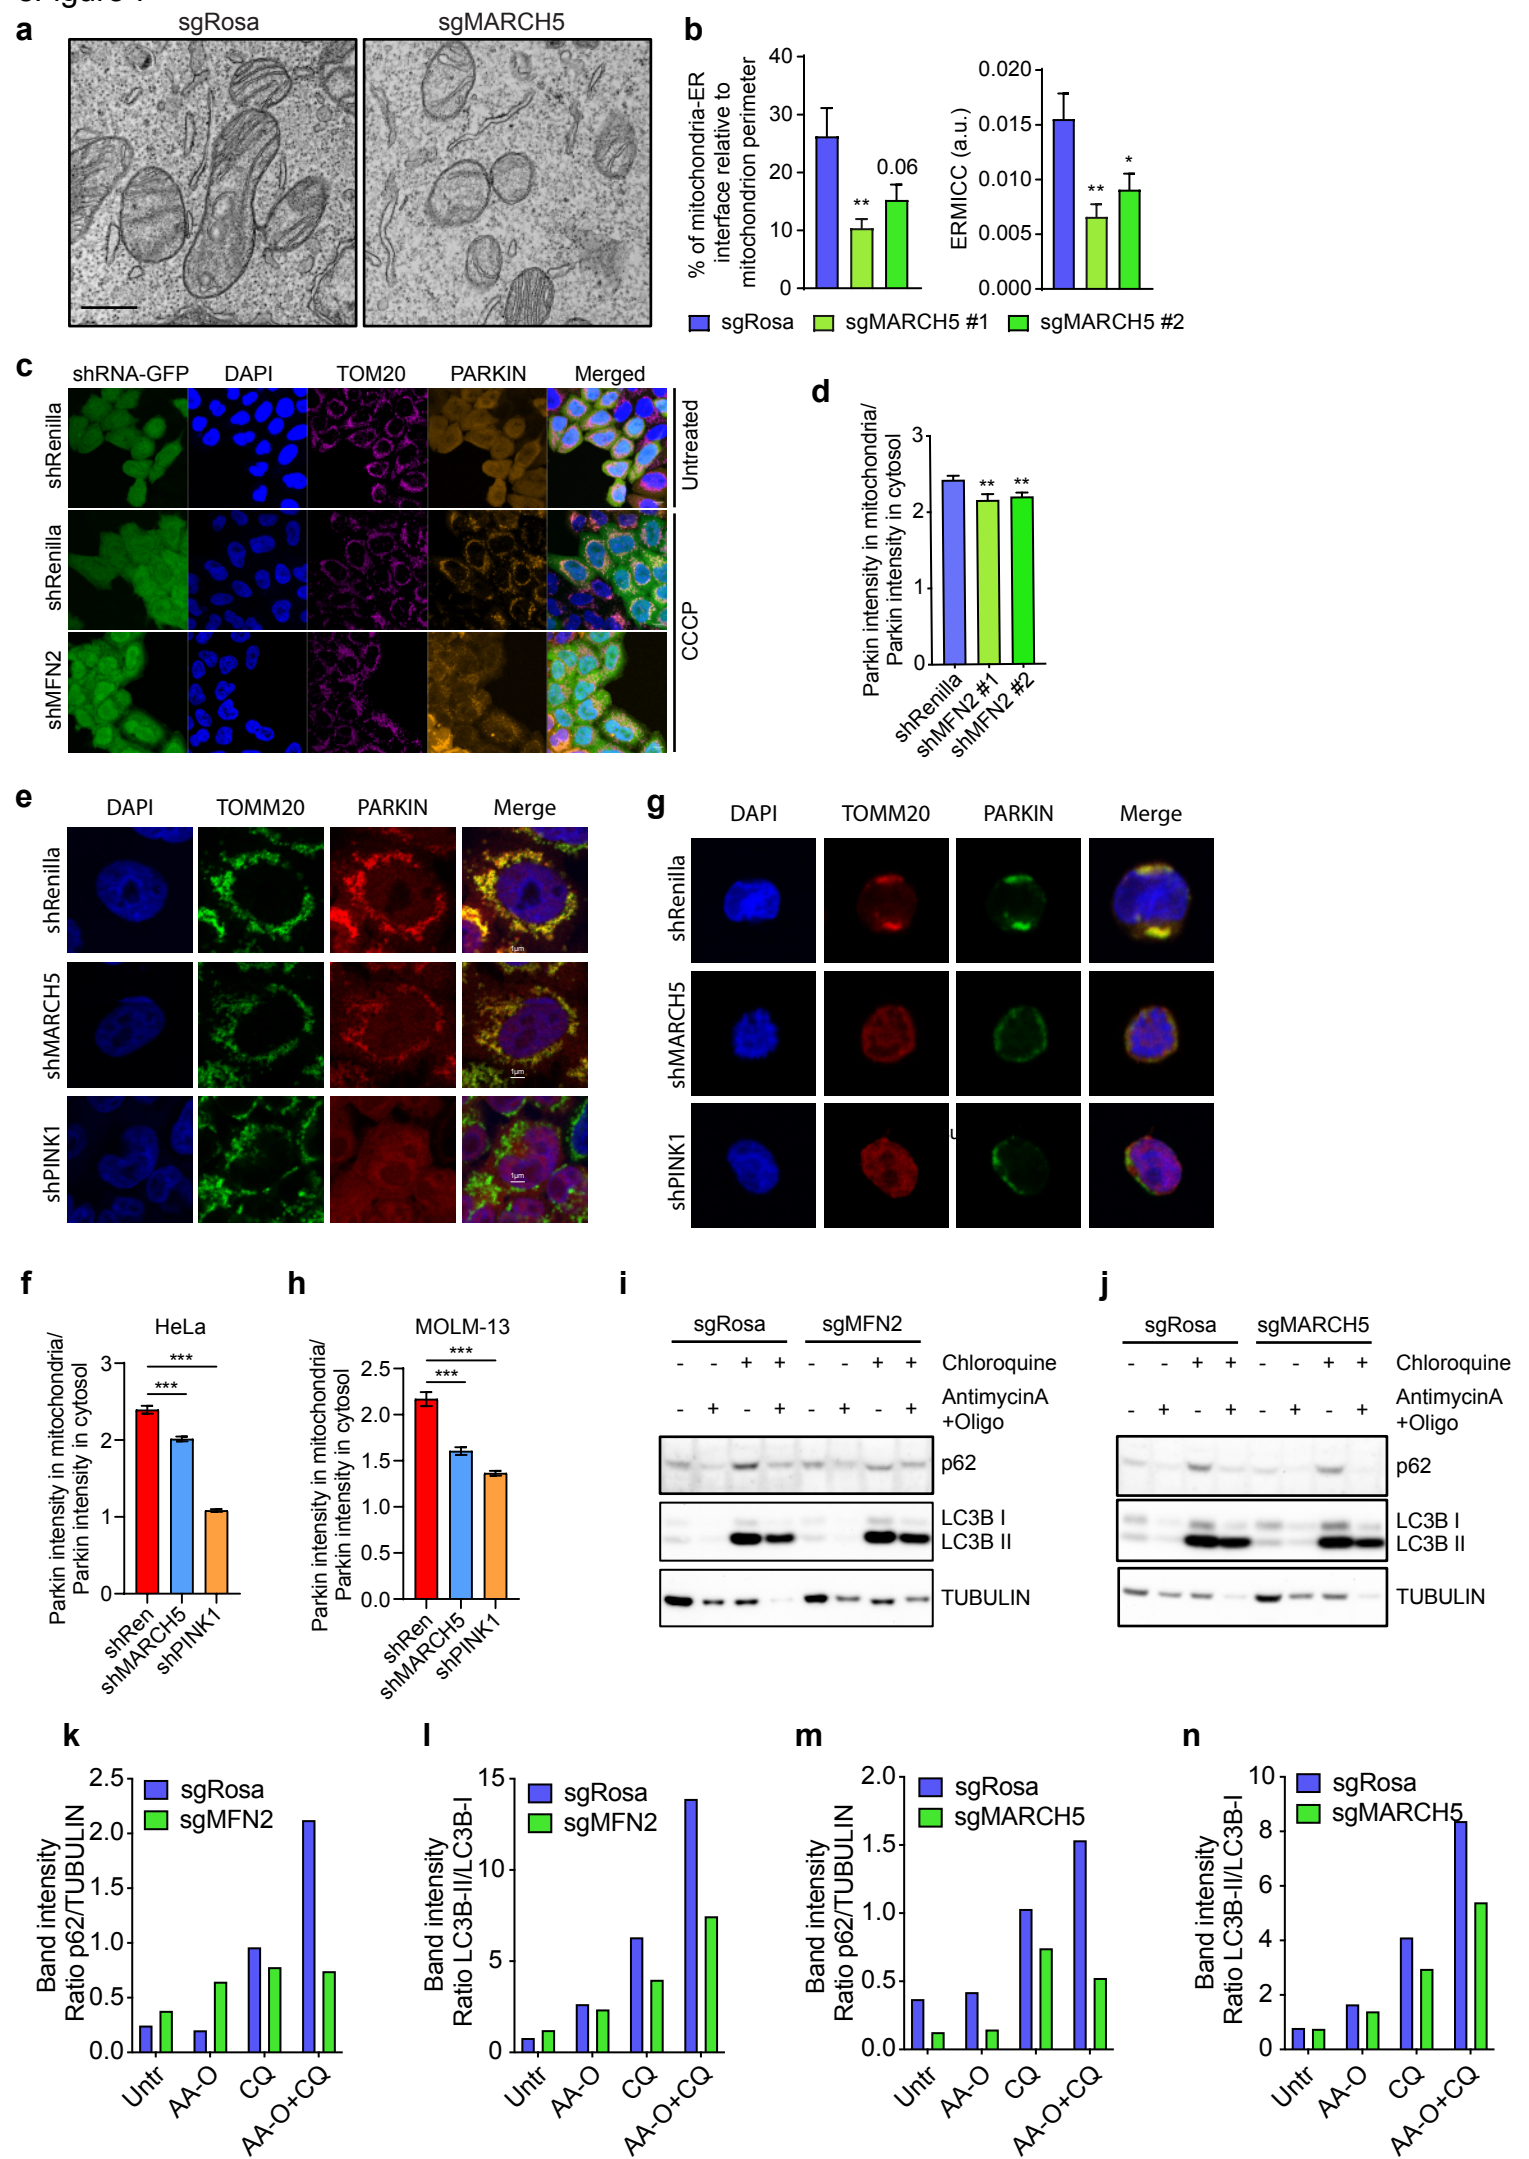

**Supplemental Figure 7. Targeting of MFN2 or MARCH5 impairs the process of mitophagy.**

- a.** Representative electron micrographs of mitochondria and ER from MOLM-13 transduced with sgRNA targeting MARCH5 or control (Rosa). Scale bar represents 0.5  $\mu\text{m}$ .
- b.** Quantification of the mitochondria-ER contacts in (a). Percentages of mitochondria-ER interface relative to the mitochondrial perimeter (left) and ER-mitochondrial contact coefficient (ERMICC; right) are shown (mean  $\pm$  SEM).
- c.** Representative confocal images of PARKIN-mCherry-expressing HeLa cells transduced with the indicated shRNAs (GFP+), treated with CCCP, and stained for TOM20 (mitochondria). Scale bars represent 10  $\mu\text{m}$ .
- d.** Quantification of PARKIN translocation onto mitochondria (colocalization index of PARKIN on TOM20) relative to the cytosolic PARKIN upon CCCP treatment in experiments as in (c).
- e.** Representative confocal images of PARKIN-mCherry-expressing HeLa cells transduced with the indicated shRNAs (GFP+), treated with CCCP, and stained for TOM20 (mitochondria). Scale bars represent 1  $\mu\text{m}$ .
- f.** Quantification of PARKIN translocation onto mitochondria (colocalization index) upon CCCP treatment relative to the cytosolic PARKIN in experiments as in (e).
- g.** Representative confocal images of PARKIN-mCherry-expressing MOLM-13 cells transduced with the indicated shRNAs (GFP+) and stained for TOM20 (mitochondria). Scale bars represent 2  $\mu\text{m}$ .
- h.** Quantification of PARKIN translocation onto mitochondria (colocalization index) relative to the cytosolic PARKIN in experiments as in (g).
- i-j.** Western blot analysis of lysates extracted from Cas9-expressing MOLM-13 cells transduced with the indicated sgRNAs, and treated with Antimycin A + Oligomycin (1  $\mu\text{M}$  / 1  $\mu\text{M}$ ) and/or chloroquine (100  $\mu\text{M}$ ) for 16 hrs.
- k.** Quantitative densitometric analysis of p62 relative to TUBULIN bands in Western blots as in (i).
- l.** Quantitative densitometric analysis of LC3B-II relative to LC3B-I bands in Western blots as in (i).
- m.** Quantitative densitometric analysis of p62 relative to TUBULIN bands in Western blots as in (j).
- n.** Quantitative densitometric analysis of LC3B-II relative to LC3B-I bands in Western blots as in (j).

Statistics were calculated using unpaired two-tailed *t*-test. Untr: Untreated; AA-O: Antimycin A + Oligomycin; CQ: Chloroquine.
